# Supplementary material for: Induction of mTOR-dependent autophagy by WS2 nanosheets from both inside and outside of human cells
Source: Royal Society of Chemistry journal article supplement (doi:10.1039/c9nr02850a), 2019-01-01
Supplement: c9nr02850a1.pdf [file c9nr02850a1.pdf]

## Supporting Information

### **Induction of mTOR-dependent Autophagy by WS<sub>2</sub> Nanosheets from both Inside and Outside of Human Cells**

Xiaofei Zhou<sup>a,b</sup>, Bing Yan<sup>a,c,\*</sup>

<sup>a</sup> Institute of Environmental Research at Greater Bay, Key Laboratory for Water Quality and Conservation of the Pearl River Delta, Ministry of Education, Guangzhou University, Guangzhou 510006, China

<sup>b</sup> School of Chemistry and Chemical Engineering, Shandong University, Jinan, 250100, China

<sup>c</sup> School of Environmental Science and Engineering, Shandong University, Jinan 250100, China

\* To whom correspondence should be addressed.

E-mail: drbingyan@yahoo.com

## Contents

1. Figure S1. Photos of WS<sub>2</sub>-4 and WS<sub>2</sub>-30 in water and cell culture medium after staying for three days.
2. Figure S2. No obvious cell damage induction by WS<sub>2</sub>-4 or WS<sub>2</sub>-30 below 4 cm<sup>2</sup>/mL in 16HBE cells.
3. Figure S3. No obvious cellular oxidative stress induction by WS<sub>2</sub>-4 or WS<sub>2</sub>-30 in 16HBE cells.
4. Figure S4. Time-dependent LC3-II formation induced by WS<sub>2</sub>-4 in 16HBE cells.
5. Figure S5. Supernatant of WS<sub>2</sub>-4 or WS<sub>2</sub>-30 had no relation to cell autophagy induction.
6. Table S1. Fold up- or down-regulation of 84 autophagic genes by super array.

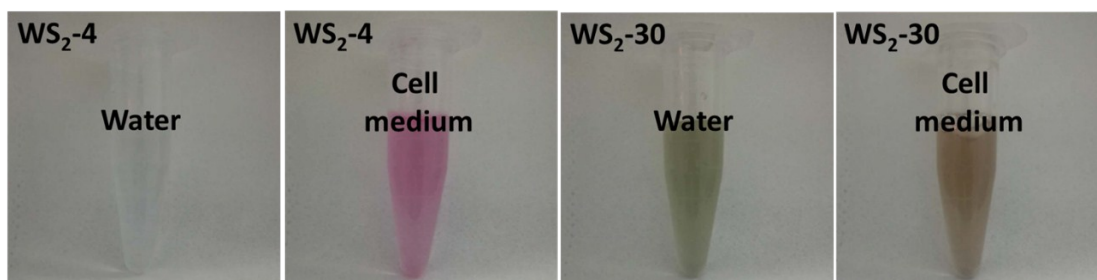

**Figure S1.** Photos of WS<sub>2</sub>-4 and WS<sub>2</sub>-30 in water and cell culture medium after staying for three days.

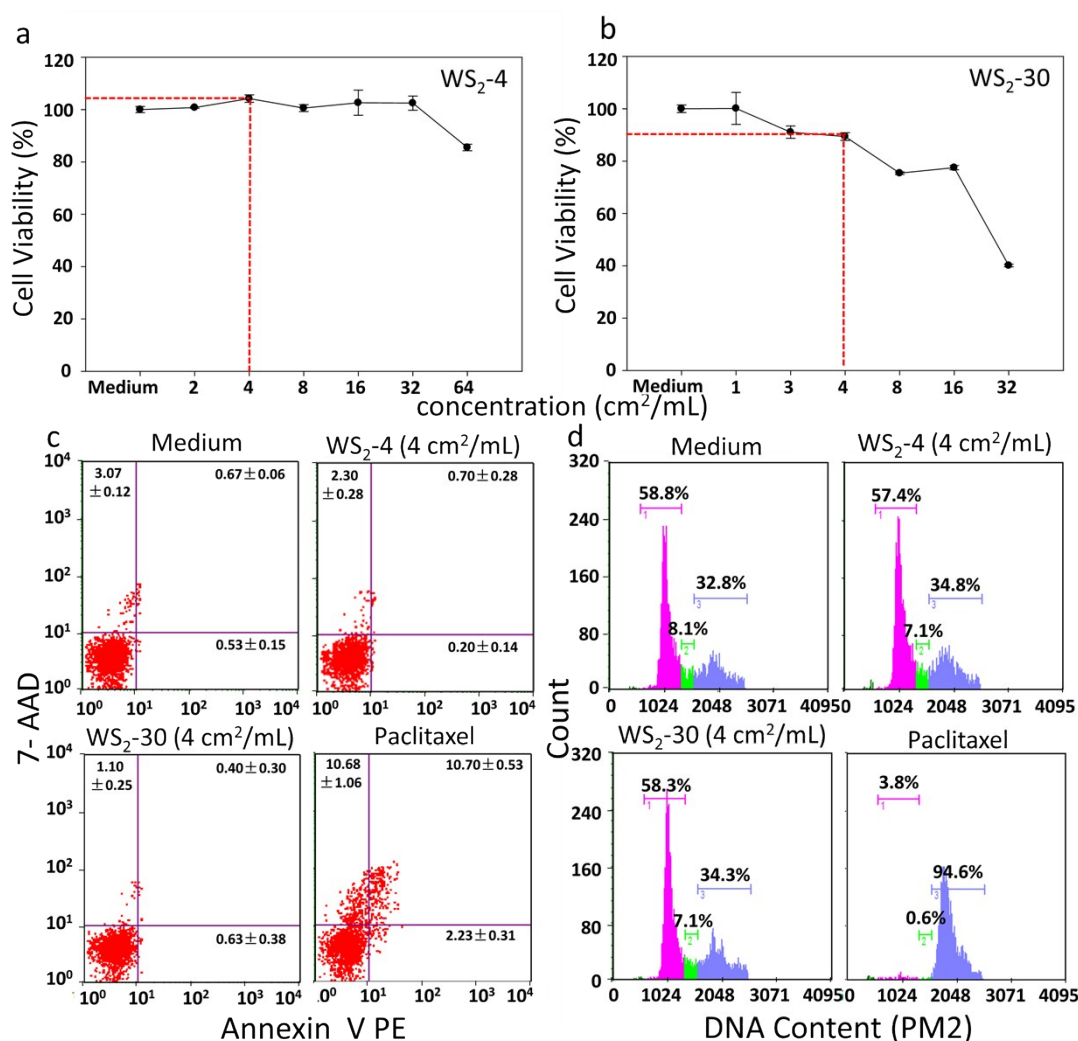

**Figure S2.** No obvious cell damage induction by WS<sub>2</sub>-4 or WS<sub>2</sub>-30 below 4 cm<sup>2</sup>/mL in 16HBE cells. (a, b) Dose-dependent cytotoxicity of WS<sub>2</sub>-4 (a) or WS<sub>2</sub>-30 (b) in 16HBE cells. (c) Apoptosis induced by WS<sub>2</sub>-4 or WS<sub>2</sub>-30 in 16HBE cells. Cells treated with cell culture medium or paclitaxel 100 nM for 12 h were used as negative or positive control. (d) Cell cycle arrest induced by WS<sub>2</sub>-4 or WS<sub>2</sub>-30 in 16HBE cells. 16HBE cells treated with cell culture medium or paclitaxel 1 μM for 12 h were used as negative or positive control.

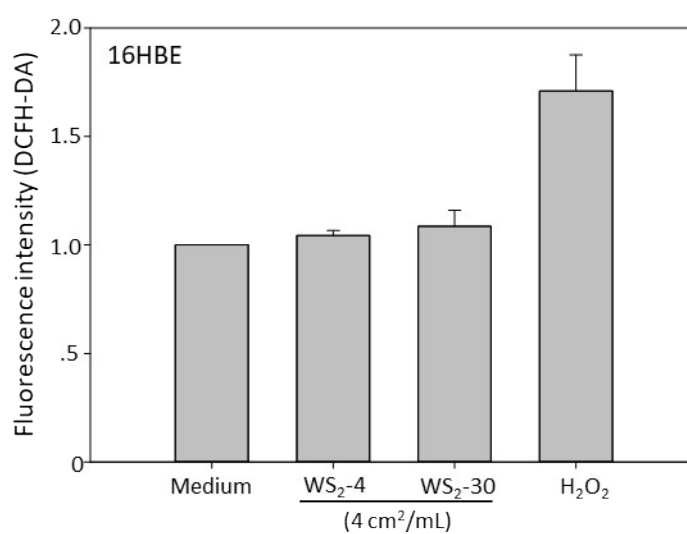

**Figure S3.** No obvious cellular oxidative stress induction by WS<sub>2</sub>-4 or WS<sub>2</sub>-30 in 16HBE cells. Cellular oxidative stress was measured after 16HBE cells were incubated with WS<sub>2</sub>-4 or WS<sub>2</sub>-30 at 4 cm<sup>2</sup>/mL for 12 h by DCFH-DA assay. H<sub>2</sub>O<sub>2</sub> (500  $\mu$ M) or cell culture medium was respectively used as positive or negative control. Data were shown as mean  $\pm$  s.d. (n = 3).

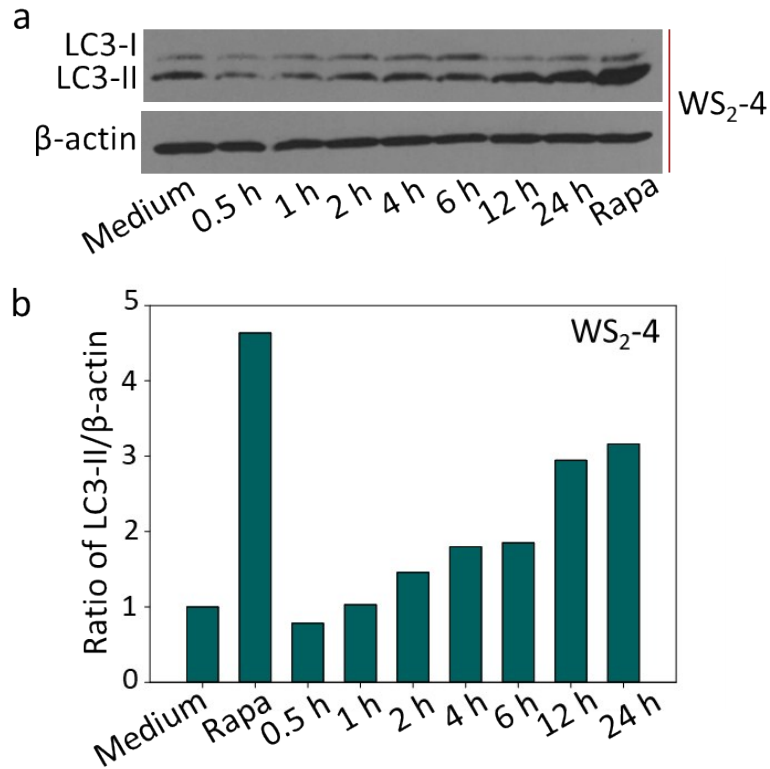

**Figure S4.** Time-dependent LC3-II formation induced by WS<sub>2</sub>-4 in 16HBE cells. (a) Time-dependent LC3-II formation after treatment with WS<sub>2</sub>-4 at a concentration of 4  $\mu$ M as determined by Western blotting against LC3B antibody in 16HBE cells. Rapamycin (10  $\mu$ M) or cell culture medium were used as positive or negative controls. (b) WS<sub>2</sub>-4 induced time-dependent LC3-II formation in 16HBE cells was quantified by the intensity ratio of LC3-II over  $\beta$ -actin bands using ImageJ.

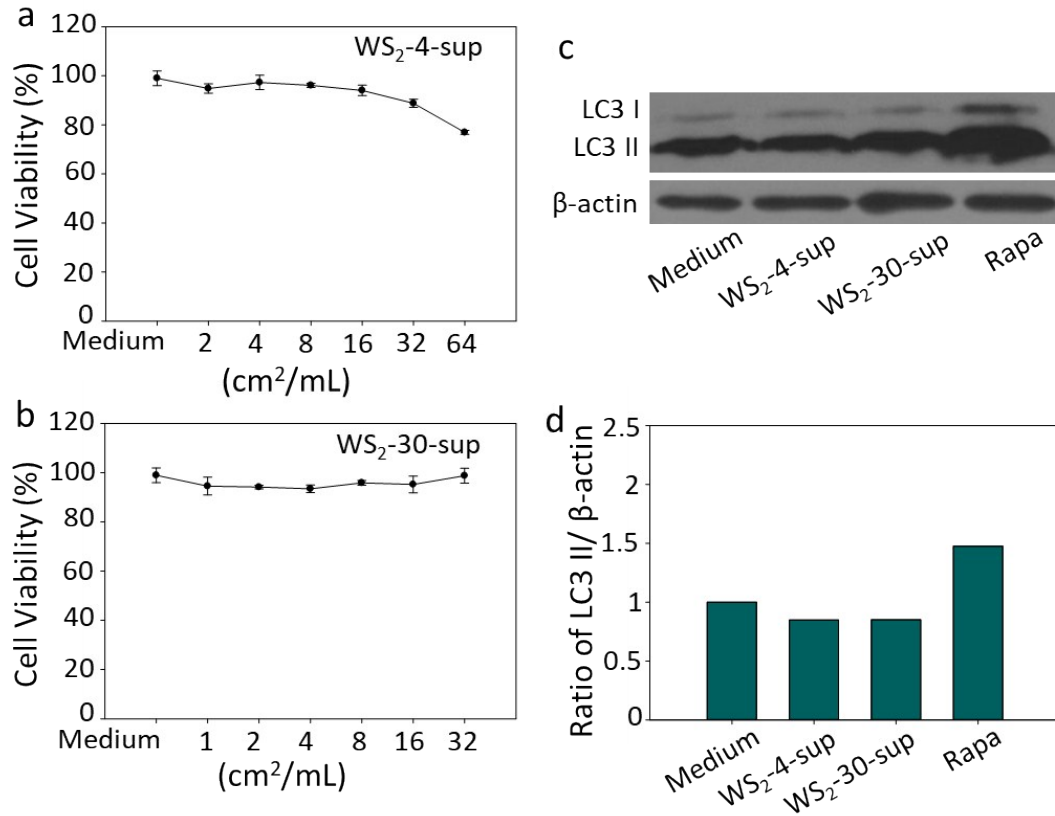

**Figure S5.** Supernatant of WS<sub>2</sub>-4 or WS<sub>2</sub>-30 had no relation to cell autophagy induction. (a, b) Dose-dependent cytotoxicity of supernatant of WS<sub>2</sub>-4 (a) or WS<sub>2</sub>-30 (b) in 16HBE cells. (c) LC3-II formation after treatment with the supernatant of WS<sub>2</sub>-4 or WS<sub>2</sub>-30 in 16HBE cells as determined by Western blotting against LC3B antibody. Cells treated with rapamycin (10  $\mu$ M) or cell culture medium for 12 h was used as the positive or negative control. (d) LC3-II formation induced by the supernatant of WS<sub>2</sub>-4 or WS<sub>2</sub>-30 was quantified by the ration of band intensity of LC3-II to  $\beta$ -actin through ImageJ.

**Table S1.** Fold up- or down-regulation of 84 autophagic genes by super array.

| Genes   | WS <sub>2</sub> -4/Control | WS <sub>2</sub> -30/Control |
|---------|----------------------------|-----------------------------|
| AKT1    | -1.32                      | -1.32                       |
| AMBRA1  | -1.16                      | -1.45                       |
| APP     | -1.83                      | -2.16                       |
| ATG10   | -1.25                      | -1.21                       |
| ATG12   | -1.11                      | -1.36                       |
| ATG16L1 | -1.22                      | -1.31                       |
| ATG16L2 | 1.57                       | -1.21                       |
| ATG3    | 1.07                       | -1.35                       |
| ATG4A   | -1.04                      | -2.41                       |
| ATG4B   | 1.29                       | -1.10                       |
| ATG4C   | -1.81                      | -1.41                       |
| ATG4D   | 1.30                       | -1.71                       |
| ATG5    | -1.61                      | -1.49                       |
| ATG7    | -1.17                      | -1.28                       |
| ATG9A   | -1.41                      | -1.68                       |
| ATG9B   | -1.72                      | 3.47                        |
| BAD     | 1.20                       | -1.95                       |
| BAK1    | -1.01                      | -1.82                       |
| BAX     | -1.13                      | -1.31                       |
| BCL2    | -2.08                      | -3.71                       |
| BCL2L1  | -1.46                      | -1.44                       |
| BECN1   | 1.19                       | -1.27                       |
| BID     | -1.77                      | -1.74                       |
| BNIP3   | 1.24                       | -1.61                       |
| CASP3   | -2.04                      | -1.72                       |
| CASP8   | -1.26                      | -1.51                       |
| CDKN1B  | -1.15                      | -2.12                       |
| CDKN2A  | 1.42                       | -1.35                       |
| CLN3    | -1.48                      | -2.03                       |
| CTSB    | 1.07                       | -1.43                       |
| CTSD    | -1.04                      | -1.42                       |
| CTSS    | 1.88                       | -1.02                       |
| CXCR4   | -2.11                      | -1.35                       |
| DAPK1   | -1.13                      | -2.01                       |
| DRAM1   | -1.94                      | -1.64                       |
| DRAM2   | -1.46                      | -2.27                       |
| EIF2AK3 | -2.01                      | -1.51                       |

|           |       |       |
|-----------|-------|-------|
| EIF4G1    | -1.44 | -1.25 |
| ESR1      | -4.17 | -1.20 |
| FADD      | -1.21 | -1.64 |
| FAS       | -1.83 | -1.55 |
| GAA       | 1.16  | -1.84 |
| GABARAP   | 1.04  | -1.40 |
| GABARAPL1 | -1.25 | -1.00 |
| GABARAPL2 | -1.49 | -1.66 |
| HDAC1     | 1.45  | -1.47 |
| HDAC6     | 1.24  | 1.23  |
| HGS       | -1.15 | -1.20 |
| HSP90AA1  | -2.33 | -2.58 |
| HSPA8     | -1.77 | -2.17 |
| HTT       | 1.07  | -1.10 |
| IFNG      | 1.42  | -1.35 |
| IGF1      | -4.45 | -1.35 |
| INS       | 1.15  | -1.35 |
| IRGM      | 1.42  | -1.35 |
| LAMP1     | -1.11 | -1.24 |
| MAP1LC3A  | -2.92 | -1.39 |
| MAP1LC3B  | -1.72 | -1.10 |
| MAPK14    | -2.74 | -1.63 |
| MAPK8     | -2.55 | -1.77 |
| MTOR      | -1.12 | -1.02 |
| NFKB1     | -1.46 | -1.19 |
| NPC1      | -4.01 | 1.10  |
| PIK3C3    | -1.56 | -2.27 |
| PIK3CG    | 2.19  | -1.35 |
| PIK3R4    | -2.34 | -1.50 |
| PRKAA1    | -2.21 | -1.77 |
| PTEN      | -1.10 | -2.38 |
| RAB24     | -1.31 | -2.08 |
| RB1       | -2.03 | -3.11 |
| RGS19     | -1.43 | -1.86 |
| RPS6KB1   | -2.01 | -1.78 |
| SNCA      | -1.05 | -2.49 |
| SQSTM1    | 1.12  | 1.09  |
| TGFB1     | -1.64 | -1.78 |
| TGM2      | -1.13 | 1.06  |
| TMEM74    | -1.45 | -2.77 |
| TNF       | 2.91  | 1.30  |
| TNFSF10   | -1.13 | -3.35 |
| TP53      | 1.12  | 1.10  |



|       |       |       |
|-------|-------|-------|
| ULK1  | 1.69  | 1.26  |
| ULK2  | -1.63 | -1.37 |
| UVRAG | -2.25 | -1.60 |
| WIPI1 | -1.06 | -1.10 |
| ACTB  | 1.05  | 1.25  |
| B2M   | -1.29 | -1.72 |
| GAPDH | 1.35  | -1.05 |
| HPRT1 | -1.22 | -1.41 |
